# Supplementary material
Source: publisher figshare collection journal article supplement (https://acs.figshare.com/ndownloader/files/3861103)
Supplement: Supplementary file 1 [file 3861103]

# **Core/shell quantum dots encapsulated in biocompatible oil-core nanocarriers as two-photon fluorescent markers for bioimaging**

**Urszula Bazylińska <sup>a)</sup>, Sławomir Drozdek <sup>a)</sup>, Marcin Nyk <sup>b)</sup>, Julita Kulbacka <sup>c)</sup>,  
Marek Samoć <sup>b)</sup>, Kazimiera A. Wilk\* <sup>a)</sup>**

*<sup>a)</sup> Department of Organic and Pharmaceutical Technology, Faculty of Chemistry, Wrocław University of Technology, Wybrzeże Wyspiańskiego 27, 50370 Wrocław, Poland*

*<sup>b)</sup> Institute of Physical and Theoretical Chemistry, Faculty of Chemistry, Wrocław University of Technology, Wybrzeże Wyspiańskiego 27, 50370 Wrocław, Poland*

*<sup>c)</sup> Department of Medical Biochemistry, Medical University of Wrocław, Chałubińskiego 10, 50-368 Wrocław, Poland*

*\* corresponding author: [kazimiera.wilk@pwr.wroc.pl](mailto:kazimiera.wilk@pwr.wroc.pl)*

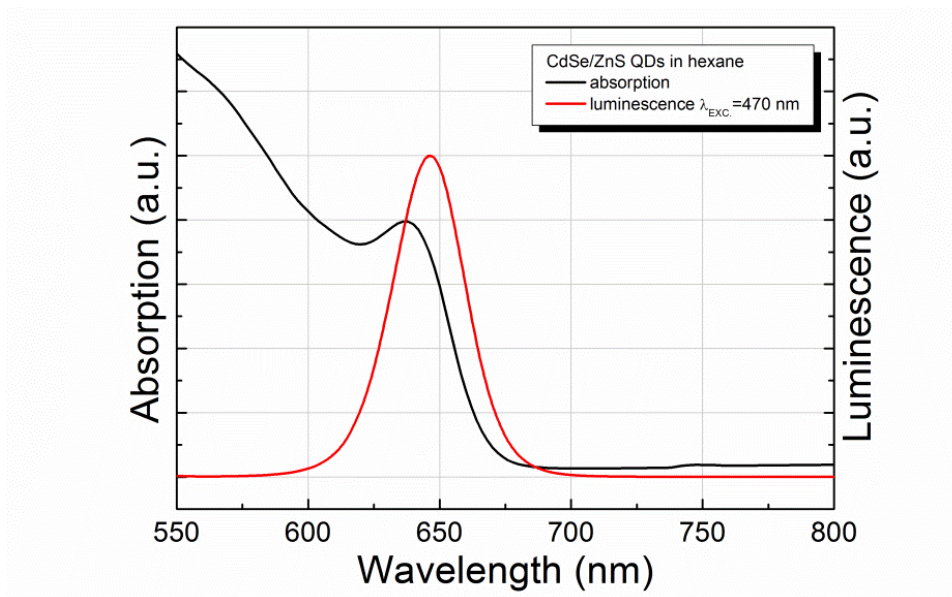

**Figure S1.** Room temperature absorption and luminescence spectra of CdSe/ZnS QDs in hexane.

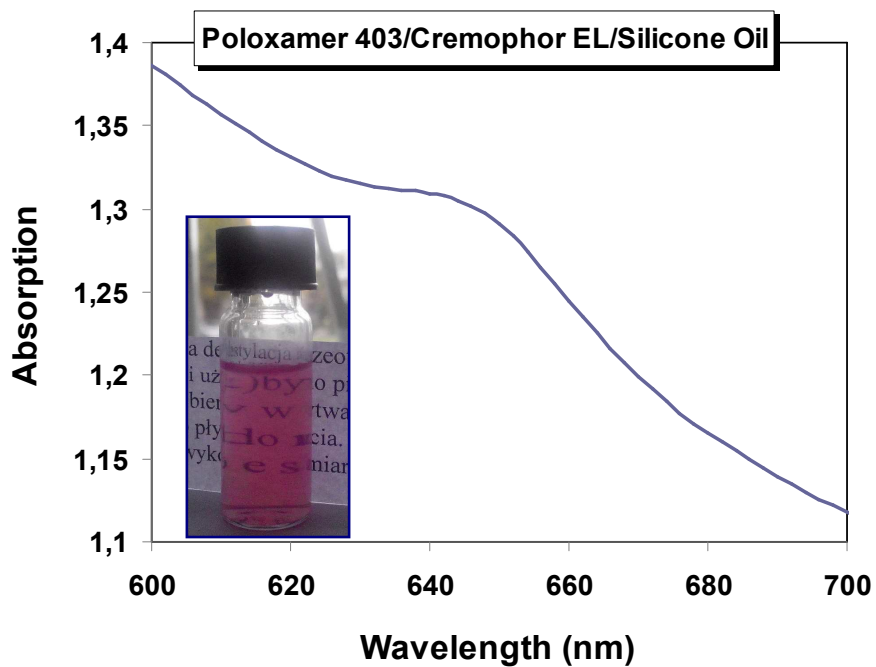

**Figure S2.** Room temperature absorption of CdSe/ZnS QDs encapsulated in oil core nanocapsules and a picture of the loaded nanocarriers aqueous dispersion demonstrates optical transparency.

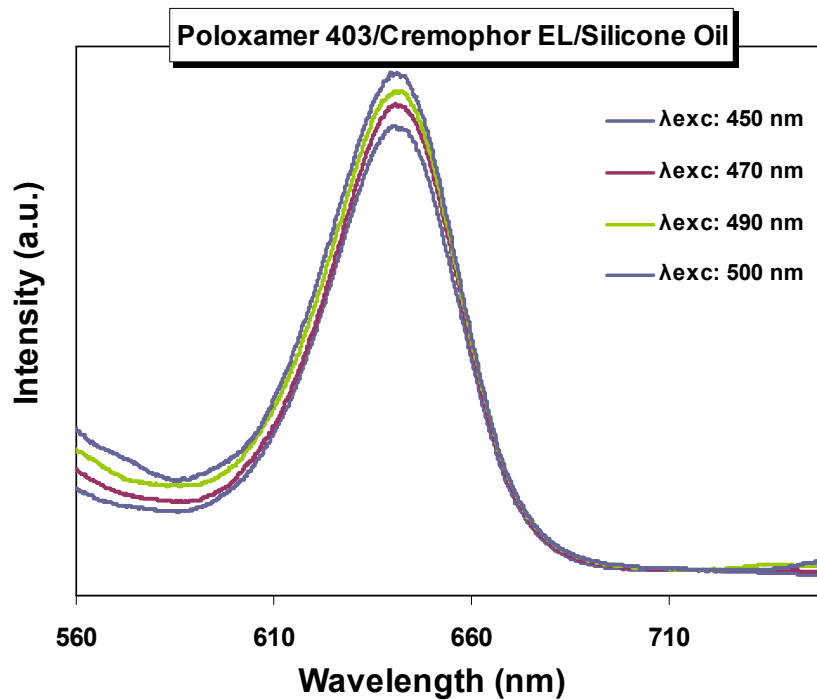

**Figure S3.** Fluorescence spectra of CdSe/ZnS-loaded nanocarriers Poloxamer 403/Cremophor EL/silicone oil (system 1b) measured under various excitation wavelengths: 450, 470, 490 and 500 nm.

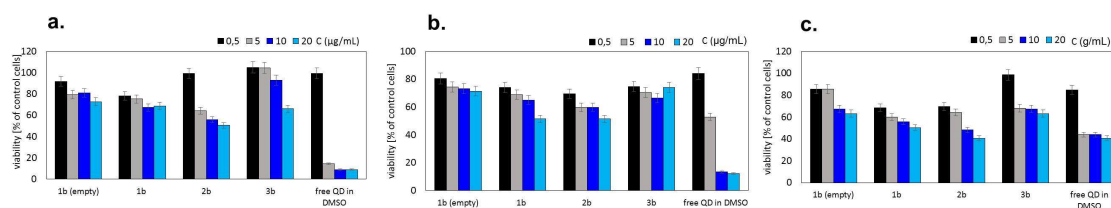

**Figure S4.** MTT assay performed after 48 h incubation with nanocarriers with QDs in (a) A549; (b) MCF-7/WT and (c) HUVEC cells (for the systems 1b-3d descriptions see Table 1).

**a.**

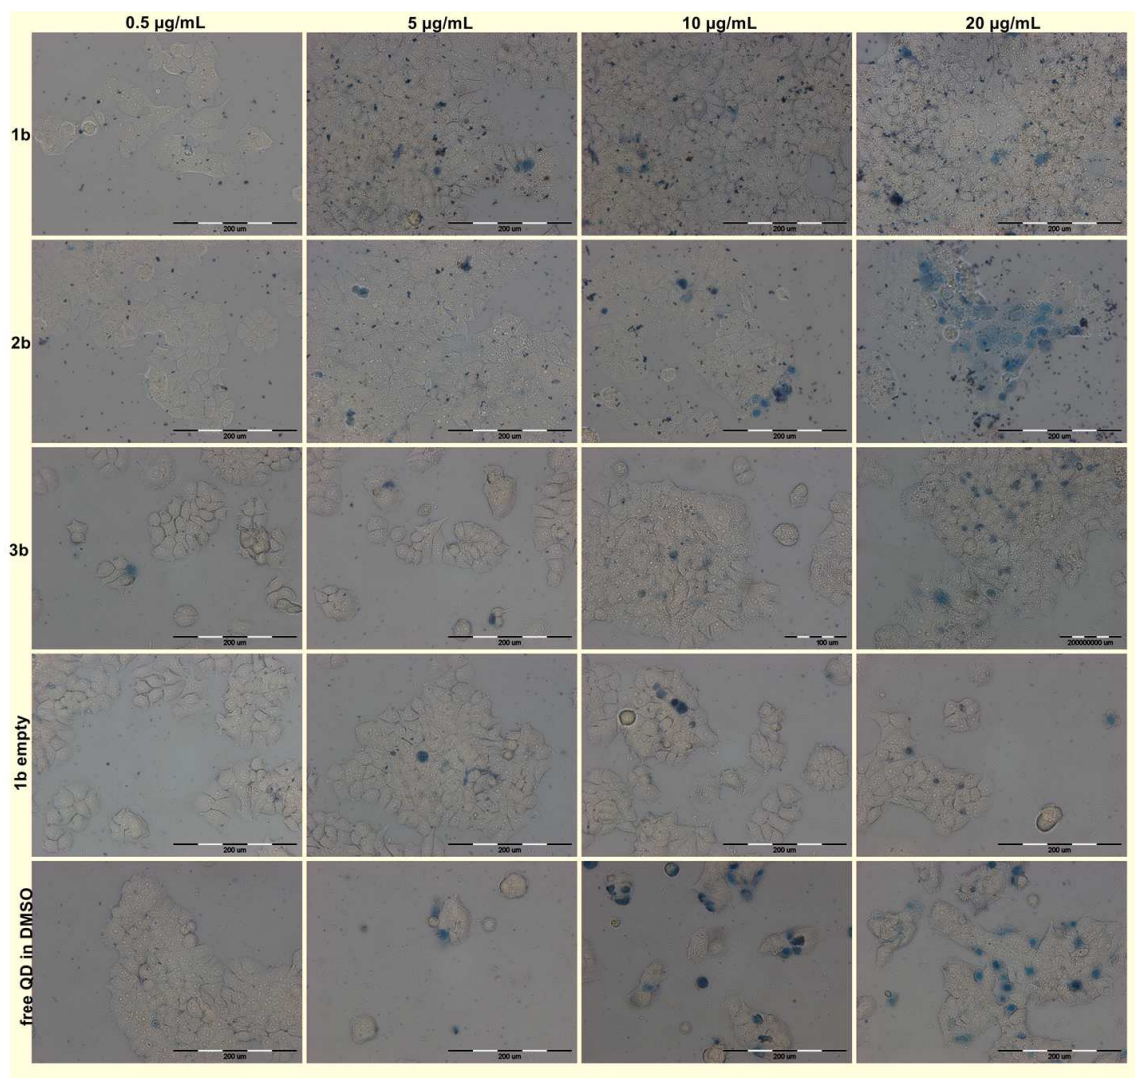

**b.**

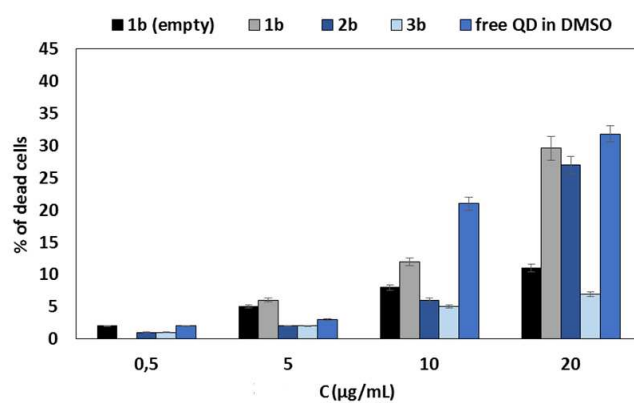

**Figure S5.** Upright microscopical visualization of trypan blue staining in MCF-7/WT cells after 24h incubation with nanocarriers with QDs (a) and trypan blue staining presented as percentage of dead cells in MCF-7/WT cell line after 24h incubation with nanocarriers with QDs (b) (see descriptions for the systems 1b-3b in Table 1).
